# Supplementary material for: Functional Correlations of Pathogenesis-Driven Gene Expression Signatures in Tuberculosis
Source: PLoS One. 2011 Oct 28;6(10):e26938. doi: 10.1371/journal.pone.0026938 (PMC3203931; doi:10.1371/journal.pone.0026938)
Supplement: Table S1 — Gene Ontology enrichment of differentially expressed genes. Enrichment analysis of genes differentially expressed between TB and LTBI was performed using the DAVID bioinformatics tool (Huang 2009). (XLS) [file pone.0026938.s003.xls]

## Sheet: GOrilla enrichment
GO Term	Description	P-value
GO:0002376	immune system process	3.85e-34
GO:0006955	immune response	1.29e-25
GO:0002682	regulation of immune system process	2.64e-22
GO:0006952	defense response	1.55e-20
GO:0050776	regulation of immune response	3.3e-20
GO:0050896	response to stimulus	8.26e-19
GO:0002684	positive regulation of immune system process	5.97e-16
GO:0009607	response to biotic stimulus	1.03e-14
GO:0050778	positive regulation of immune response	2.41e-14
GO:0006950	response to stress	5.61e-14
GO:0051707	response to other organism	1e-13
GO:0051716	cellular response to stimulus	5.79e-13
GO:0007165	signal transduction	1.02e-12
GO:0001775	cell activation	2.46e-12
GO:0050865	regulation of cell activation	4.67e-12
GO:0002694	regulation of leukocyte activation	1.23e-11
GO:0051249	regulation of lymphocyte activation	2.12e-11
GO:0045087	innate immune response	2.39e-11
GO:0050863	regulation of T cell activation	4.23e-10
GO:0045321	leukocyte activation	4.52e-10
GO:0050867	positive regulation of cell activation	7.86e-10
GO:0002253	activation of immune response	1.68e-09
GO:0009617	response to bacterium	2.13e-09
GO:0009987	cellular process	2.23e-09
GO:0042742	defense response to bacterium	2.53e-09
GO:0051251	positive regulation of lymphocyte activation	3.81e-09
GO:0051704	multi-organism process	4.8e-09
GO:0007166	cell surface receptor linked signaling pathway	4.93e-09
GO:0065007	biological regulation	5.13e-09
GO:0002696	positive regulation of leukocyte activation	5.74e-09
GO:0002237	response to molecule of bacterial origin	6.8e-09
GO:0034097	response to cytokine stimulus	6.95e-09
GO:0048583	regulation of response to stimulus	1.24e-08
GO:0001817	regulation of cytokine production	2.28e-08
GO:0002252	immune effector process	2.95e-08
GO:0048584	positive regulation of response to stimulus	4.93e-08
GO:0002697	regulation of immune effector process	5.41e-08
GO:0031347	regulation of defense response	6.04e-08
GO:0050789	regulation of biological process	8.72e-08
GO:0046649	lymphocyte activation	1.01e-07
GO:0050870	positive regulation of T cell activation	1.2e-07
GO:0042221	response to chemical stimulus	1.22e-07
GO:0002757	immune response-activating signal transduction	1.79e-07
GO:0048518	positive regulation of biological process	2.25e-07
GO:0002764	immune response-regulating signaling pathway	2.65e-07
GO:0071345	cellular response to cytokine stimulus	2.7e-07
GO:0032496	response to lipopolysaccharide	3.11e-07
GO:0010033	response to organic substance	4.87e-07
GO:0009615	response to virus	5.85e-07
GO:0080134	regulation of response to stress	1.01e-06
GO:0007599	hemostasis	1.63e-06
GO:0019221	cytokine-mediated signaling pathway	2.36e-06
GO:0050794	regulation of cellular process	2.6e-06
GO:0050817	coagulation	2.63e-06
GO:0007596	blood coagulation	2.63e-06
GO:0050878	regulation of body fluid levels	2.88e-06
GO:0042116	macrophage activation	2.91e-06
GO:0008150	biological_process	3.15e-06
GO:0042110	T cell activation	3.21e-06
GO:0002429	immune response-activating cell surface receptor signaling pathway	3.84e-06
GO:0002576	platelet degranulation	5.83e-06
GO:0001774	microglial cell activation	5.93e-06
GO:0002768	immune response-regulating cell surface receptor signaling pathway	6.01e-06
GO:0050851	antigen receptor-mediated signaling pathway	6.18e-06
GO:0006887	exocytosis	6.73e-06
GO:0009611	response to wounding	8.16e-06
GO:0006954	inflammatory response	8.47e-06
GO:0002366	leukocyte activation involved in immune response	9.27e-06
GO:0002263	cell activation involved in immune response	9.27e-06
GO:0006959	humoral immune response	9.78e-06
GO:0032493	response to bacterial lipoprotein	1.06e-05
GO:0071221	cellular response to bacterial lipopeptide	1.06e-05
GO:0071220	cellular response to bacterial lipoprotein	1.06e-05
GO:0070339	response to bacterial lipopeptide	1.06e-05
GO:0002702	positive regulation of production of molecular mediator of immune response	1.42e-05
GO:0050671	positive regulation of lymphocyte proliferation	1.56e-05
GO:0048522	positive regulation of cellular process	1.75e-05
GO:0032946	positive regulation of mononuclear cell proliferation	1.84e-05
GO:0065008	regulation of biological quality	1.86e-05
GO:0050670	regulation of lymphocyte proliferation	1.98e-05
GO:0070665	positive regulation of leukocyte proliferation	2.18e-05
GO:0045088	regulation of innate immune response	2.18e-05
GO:0002822	regulation of adaptive immune response based on somatic recombination of immune receptors built from immunoglobulin superfamily domains	2.23e-05
GO:0032944	regulation of mononuclear cell proliferation	2.27e-05
GO:0002683	negative regulation of immune system process	2.43e-05
GO:0070663	regulation of leukocyte proliferation	2.59e-05
GO:0002521	leukocyte differentiation	2.68e-05
GO:0002819	regulation of adaptive immune response	2.7e-05
GO:0032490	detection of molecule of bacterial origin	2.93e-05
GO:0030168	platelet activation	3.23e-05
GO:0071824	protein-DNA complex subunit organization	3.37e-05
GO:0043900	regulation of multi-organism process	3.52e-05
GO:0001818	negative regulation of cytokine production	3.52e-05
GO:0001819	positive regulation of cytokine production	3.87e-05
GO:0045428	regulation of nitric oxide biosynthetic process	4.05e-05
GO:0002700	regulation of production of molecular mediator of immune response	4.24e-05
GO:0034341	response to interferon-gamma	4.78e-05
GO:0065004	protein-DNA complex assembly	5.49e-05
GO:0070887	cellular response to chemical stimulus	5.64e-05
GO:0031349	positive regulation of defense response	5.9e-05
GO:0030098	lymphocyte differentiation	6.01e-05
GO:0002706	regulation of lymphocyte mediated immunity	6.16e-05
GO:0045580	regulation of T cell differentiation	6.16e-05
GO:0002274	myeloid leukocyte activation	6.47e-05
GO:0060333	interferon-gamma-mediated signaling pathway	6.59e-05
GO:0071310	cellular response to organic substance	7.15e-05
GO:0002824	positive regulation of adaptive immune response based on somatic recombination of immune receptors built from immunoglobulin superfamily domains	9.02e-05
GO:0031294	lymphocyte costimulation	9.16e-05
GO:0031295	T cell costimulation	9.16e-05
GO:0071346	cellular response to interferon-gamma	0.000107
GO:0002718	regulation of cytokine production involved in immune response	0.000112
GO:0002821	positive regulation of adaptive immune response	0.000115
GO:0071219	cellular response to molecule of bacterial origin	0.000124
GO:0042035	regulation of cytokine biosynthetic process	0.000139
GO:0010935	regulation of macrophage cytokine production	0.000145
GO:0052552	modulation by organism of immune response of other organism involved in symbiotic interaction	0.000145
GO:0052555	positive regulation by organism of immune response of other organism involved in symbiotic interaction	0.000145
GO:0052556	positive regulation by symbiont of host immune response	0.000145
GO:0052553	modulation by symbiont of host immune response	0.000145
GO:0052257	pathogen-associated molecular pattern dependent induction by organism of innate immunity of other organism involved in symbiotic interaction	0.000145
GO:0052308	pathogen-associated molecular pattern dependent modulation by organism of innate immunity in other organism involved in symbiotic interaction	0.000145
GO:0052305	positive regulation by organism of innate immunity in other organism involved in symbiotic interaction	0.000145
GO:0052306	modulation by organism of innate immunity in other organism involved in symbiotic interaction	0.000145
GO:0052169	pathogen-associated molecular pattern dependent modulation by symbiont of host innate immunity	0.000145
GO:0052167	modulation by symbiont of host innate immunity	0.000145
GO:0052166	positive regulation by symbiont of host innate immunity	0.000145
GO:0052033	pathogen-associated molecular pattern dependent induction by symbiont of host innate immunity	0.000145
GO:0006334	nucleosome assembly	0.000166
GO:0034728	nucleosome organization	0.000167
GO:0032680	regulation of tumor necrosis factor production	0.000183
GO:0070340	detection of bacterial lipopeptide	0.000187
GO:0070163	regulation of adiponectin secretion	0.000187
GO:0042494	detection of bacterial lipoprotein	0.000187
GO:0010941	regulation of cell death	0.000198
GO:0032940	secretion by cell	0.000206
GO:0002720	positive regulation of cytokine production involved in immune response	0.000209
GO:0030890	positive regulation of B cell proliferation	0.00021
GO:0043067	regulation of programmed cell death	0.000215
GO:0050727	regulation of inflammatory response	0.000237
GO:0045619	regulation of lymphocyte differentiation	0.000238
GO:0006979	response to oxidative stress	0.000239
GO:0043123	positive regulation of I-kappaB kinase/NF-kappaB cascade	0.000239
GO:0016192	vesicle-mediated transport	0.000254
GO:0002699	positive regulation of immune effector process	0.000261
GO:0050900	leukocyte migration	0.000269
GO:0043122	regulation of I-kappaB kinase/NF-kappaB cascade	0.000269
GO:0030217	T cell differentiation	0.00028
GO:0019722	calcium-mediated signaling	0.000282
GO:0032655	regulation of interleukin-12 production	0.000287
GO:0002703	regulation of leukocyte mediated immunity	0.00032
GO:0002282	microglial cell activation involved in immune response	0.000324
GO:0052564	response to immune response of other organism involved in symbiotic interaction	0.000324
GO:0052572	response to host immune response	0.000324
GO:0042769	DNA damage response, detection of DNA damage	0.000324
GO:0051239	regulation of multicellular organismal process	0.000325
GO:0006968	cellular defense response	0.00033
GO:0071216	cellular response to biotic stimulus	0.00033
GO:0050852	T cell receptor signaling pathway	0.000342
GO:0030888	regulation of B cell proliferation	0.000345
GO:0002275	myeloid cell activation involved in immune response	0.000353
GO:0042981	regulation of apoptosis	0.000418
GO:0009593	detection of chemical stimulus	0.000428
GO:0051100	negative regulation of binding	0.000484
GO:0060334	regulation of interferon-gamma-mediated signaling pathway	0.000491
GO:0060330	regulation of response to interferon-gamma	0.000491
GO:0050829	defense response to Gram-negative bacterium	0.00053
GO:0051240	positive regulation of multicellular organismal process	0.000544
GO:0046903	secretion	0.000601
GO:0071357	cellular response to type I interferon	0.000606
GO:0060337	type I interferon-mediated signaling pathway	0.000606
GO:0050871	positive regulation of B cell activation	0.00061
GO:0052509	positive regulation by symbiont of host defense response	0.000618
GO:0052510	positive regulation by organism of defense response of other organism involved in symbiotic interaction	0.000618
GO:0052255	modulation by organism of defense response of other organism involved in symbiotic interaction	0.000618
GO:0052031	modulation by symbiont of host defense response	0.000618
GO:0042535	positive regulation of tumor necrosis factor biosynthetic process	0.000618
GO:0009595	detection of biotic stimulus	0.000667
GO:0019835	cytolysis	0.000667
GO:0034340	response to type I interferon	0.0007
GO:0050864	regulation of B cell activation	0.0007
GO:0002831	regulation of response to biotic stimulus	0.0007
GO:0033089	positive regulation of T cell differentiation in thymus	0.000714
GO:0042108	positive regulation of cytokine biosynthetic process	0.000735
GO:0001910	regulation of leukocyte mediated cytotoxicity	0.000803
GO:0035556	intracellular signal transduction	0.000915
GO:0051098	regulation of binding	0.000939
